# Supplementary material for: High-Resolution Imaging of the Optic Nerve and Retina in Optic Nerve Hypoplasia
Source: PubMed Central journal article supplement — Ophthalmology. 2015 Jul;122(7):1330–9. doi: 10.1016/j.ophtha.2015.03.020 (PMC4518044; doi:10.1016/j.ophtha.2015.03.020), 2015-07
Supplement: mmc1.pdf [file mmc1.pdf]

**Table 1.** Clinical and demographic characteristics of the patients with optic nerve hypoplasia who participated in the study.

| Patient's number | Age | Gender | Clinically affected eye | Additional ocular findings | Best corrected visual acuity (logMAR) |                         | Refraction (Spherical equivalent) |       | Nystagmus          | SOD     |
|------------------|-----|--------|-------------------------|----------------------------|---------------------------------------|-------------------------|-----------------------------------|-------|--------------------|---------|
|                  |     |        |                         |                            | RE                                    | LE                      | RE                                | LE    |                    |         |
| 1                | 9   | M      | RE                      | -                          | NPL                                   | 0.25                    | +7.0                              | +4.5  | Present, MLN       | Absent  |
| 2                | 20  | F      | LE                      | -                          | 0.30                                  | 1.00                    | 0                                 | 0     | Present, MLN       | Absent  |
| 3                | 62  | F      | BE                      | ONHD                       | 1.00                                  | 0.9                     | +4.5                              | +4.0  | Present, infantile | No MRI  |
| 4                | 26  | M      | BE                      | ONHD                       | 0.9                                   | 0.9                     | 0                                 | 0     | Present, infantile | No MRI  |
| 5                | 17  | F      | RE                      | -                          | PL                                    | 0.00                    | -8.0                              | -7.5  | Present, infantile | Absent  |
| 6                | 16  | M      | BE                      | -                          | NPL                                   | 1.00                    | +1.0                              | 0     | Present, infantile | Absent  |
| 7                | 15  | F      | LE                      | -                          | 0.10                                  | PL                      | +0.5                              | +1.5  | Present, MLN       | No MRI  |
| 8                | 10  | M      | LE                      | ONHD                       | 0.4                                   | PL                      | +4.25                             | +2.75 | Absent             | Absent  |
| 9                | 50  | M      | BE                      | -                          | 0.30                                  | 0.40                    | -1.25                             | -1.25 | Present, infantile | No MRI  |
| 10               | 17  | F      | LE                      | -                          | 0.00                                  | PL                      | +3.0                              | +3.0  | Absent             | Present |
| 11               | 2   | F      | RE                      | -                          | Fixes and follows                     | Fixes and follows       | +2.0                              | +2.0  | Absent             | Absent  |
| 12               | 2   | M      | RE                      | -                          | NPL                                   | 0.10                    | +2.0                              | +2.0  | Present, MLN       | Absent  |
| 13               | 7   | F      | RE                      | -                          | 0.75                                  | 0.075                   |                                   |       | Present, MLN       | Present |
| 14               | 7   | F      | BE                      | -                          | NPL                                   | NPL                     | +4.50                             | +1.25 | Present, MLN       | Present |
| 15               | 1   | M      | RE                      | -                          | Does not fix and follow               | Fixes and follows       | +1.75                             | +2.75 | Absent             | Absent  |
| 16               | 2   | F      | BE                      | -                          | Does not fix and follow               | Does not fix and follow | +2.0                              | +2.0  | Present, MLN       | Present |

M=male, F=female; RE=right eye, LE=left eye, BE=both eyes; ONHD=optic nerve head drusen; NPL=no perception of light, PL= perception of light; MLN=manifest latent nystagmus associated with strabismus; SOD=septo-optic dysplasia; MRI= magnetic resonance imaging.
